# Supplementary material
Source: publisher figshare collection journal article supplement (https://wiley.figshare.com/ndownloader/files/11612963)
Supplement: Supplementary file 1 [file 11612963]

| Spearman correlation table  |                 |         |         |       |
|-----------------------------|-----------------|---------|---------|-------|
| Target                      | Differentiation | Type    | p value | R     |
| Myf6                        | Myoblasts       | RNA     | 0.05    | -0.52 |
| Myf6                        | Myotubes        | RNA     | 0.02*   | -0.59 |
| Myogenin                    | Myotubes        | Protein | 0.08    | -0.48 |
| pAkt <sup>(Ser473)</sup>    | Myotubes        | Protein | 0.08    | -0.48 |
| Total Akt                   | Myotubes        | Protein | 0.06    | -0.51 |
| Total FoxO1                 | Myotubes        | Protein | 0.09    | -0.46 |
| pFoxo3a <sup>(Ser253)</sup> | Myotubes        | Protein | 0.08    | -0.47 |
| Total FoxO3a                | Myotubes        | Protein | 0.04*   | -0.54 |
| p62                         | Myotubes        | Protein | 0.06    | 0.51  |

\*  $p < 0.05$

**Supporting table 1:** Results of Spearman correlation analysis of measured parameters to participant age. Values presented are the parameters that correlated significantly (\* -  $p < 0.05$ ) or had a tendency to correlate ( $p < 0.1$ ) to participant age.

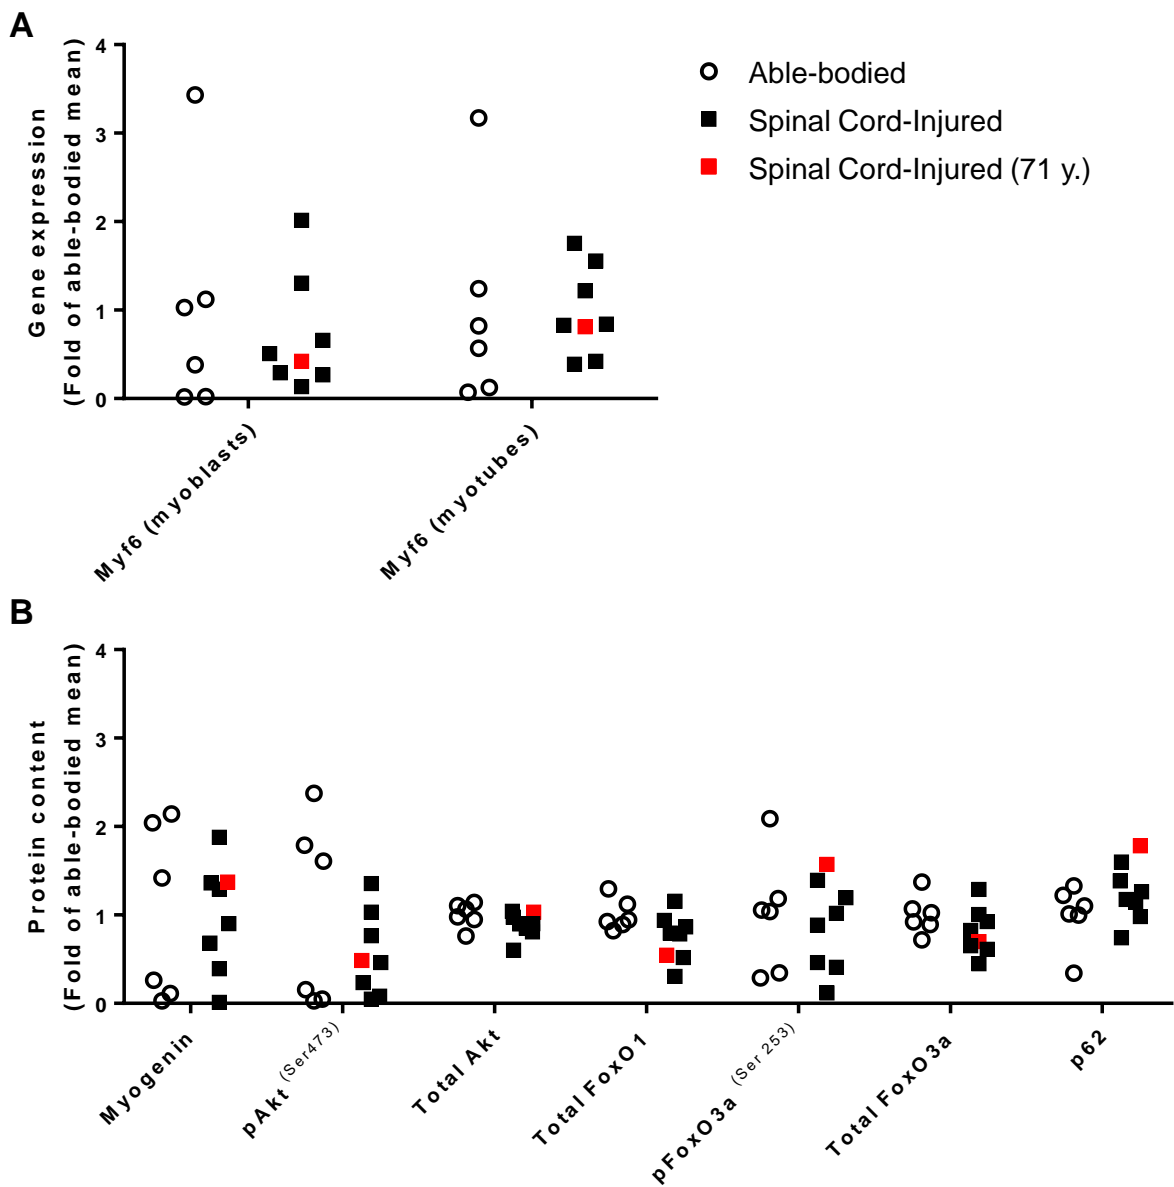

**Supporting figure 1:** Individual data points of (A) gene expression in myoblasts and myotubes and (B) protein content in myotubes of parameters that significantly ( $p < 0.05$ ; Spearman) correlated or tended ( $p < 0.1$ ; Spearman) to correlate to participant age. Able-bodied participants are presented as empty circles, and spinal cord-injured participants as filled squares. The squares coloured red belong to the oldest participant with spinal cord injury (age 71 years). Data are arbitrary units scaled to able-bodied mean.

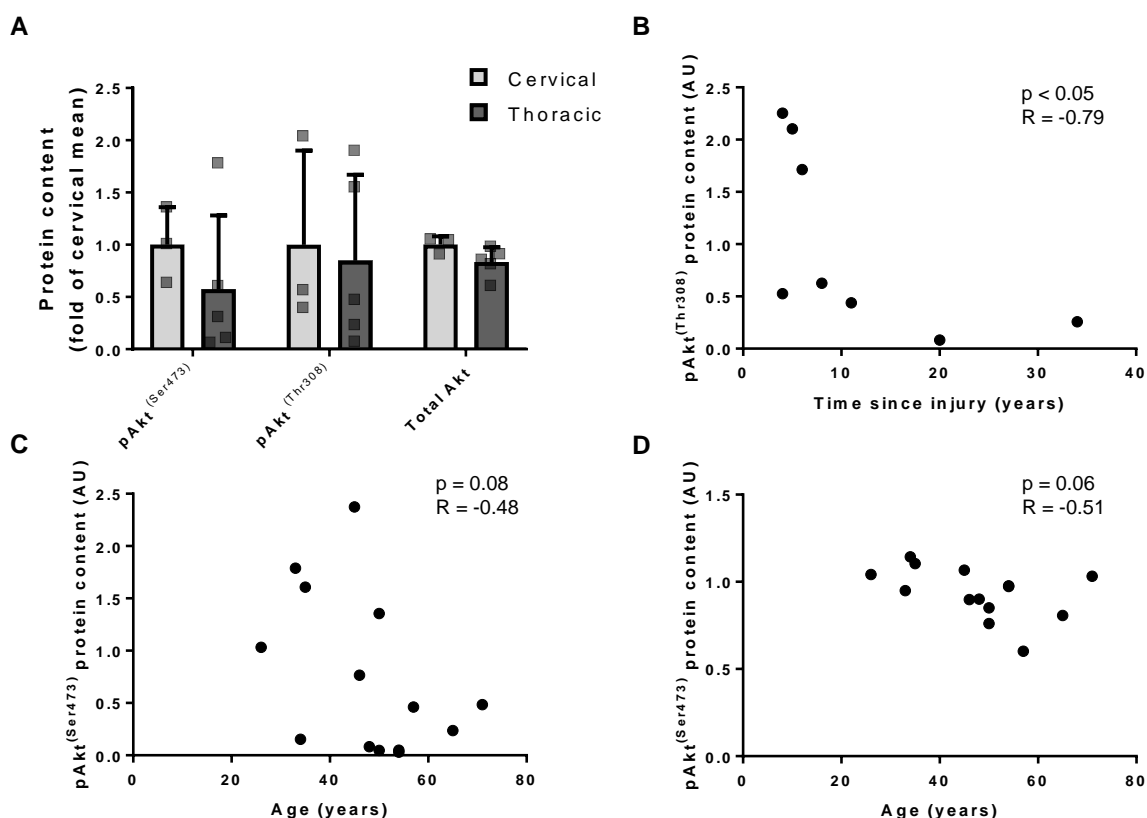

**Supporting figure 2:** (A) Comparison of phosphorylated <sup>(Ser473)</sup> and <sup>(Thr308)</sup> and total Akt between participants with cervical and thoracic spinal cord injury. (B) Protein content of phosphorylated Akt at <sup>(Thr308)</sup> correlated significantly ( $p < 0.05$ ,  $R = -0.79$ , Spearman) to time since injury. (C; D) Phosphorylated Akt at <sup>(Ser473)</sup> and Total Akt protein content ( $p = 0.08$  and  $0.06$ ,  $R = -0.48$  and  $-0.51$ , respectively) tended to correlate to participant age.
